# Supplementary material for: Artificial Intelligence-Based Opportunities in Liver Pathology—A Systematic Review
Source: MDPI journal article supplement (doi:10.3390/diagnostics13101799), 2023-05-19

| Authors (Year)<br>[Reference]    | Risk of bias      |            |                    |                 |
|----------------------------------|-------------------|------------|--------------------|-----------------|
|                                  | Patient Selection | Index Test | Reference Standard | Flow and Timing |
| Feng Y. et al. (2021)<br>[11]    |                   |            |                    |                 |
| Cancian P. et al. (2021)<br>[12] |                   |            |                    |                 |
| Roy M. et al. (2021)<br>[13]     |                   |            |                    |                 |
| Wang X. et al. (2021)<br>[14]    |                   |            |                    |                 |
| Feng S. et al. (2021)<br>[15]    |                   |            |                    |                 |
| Yang TL. et al. (2022)<br>[16]   |                   |            |                    |                 |
| Li S. et al. (2017)<br>[17]      |                   |            |                    |                 |
| Kiani A. et al. (2020)<br>[18]   |                   |            |                    |                 |
| Schau GF. et al. (2020)<br>[19]  |                   |            |                    |                 |
| Ercan C. et al. (2022)<br>[20]   |                   |            |                    |                 |
| Diao S. et al. (2022)<br>[21]    |                   |            |                    |                 |
| Cheng N. et al. (2022)<br>[22]   |                   |            |                    |                 |
| Xie J. et al. (2022)<br>[23]     |                   |            |                    |                 |
| Chen M. et al. (2020)<br>[24]    |                   |            |                    |                 |
| Liao H. et al. (2020)<br>[25]    |                   |            |                    |                 |

|                                     |       |       |      |  |
|-------------------------------------|-------|-------|------|--|
| Saillard C. et al. (2020)<br>[26]   | Green | Pink  | Grey |  |
| Yamashita et al. (2021)<br>[27]     |       |       |      |  |
| Saito A. et al. (2021)<br>[28]      |       |       |      |  |
| Xiao C. et al. (2022)<br>[29]       |       |       |      |  |
| Chen Q. et al. (2022)<br>[30]       |       |       |      |  |
| Zeng Q. et al. (2022)<br>[31]       |       |       |      |  |
| Qu WF. et al. (2022)<br>[32]        |       |       |      |  |
| Guo X. et al. (2018)<br>[34]        | Pink  | Green |      |  |
| Jirik M. et al. (2020)<br>[35]      |       |       |      |  |
| Roy M. et al. (2020)<br>[36]        |       |       |      |  |
| Yu H. et al (2022)<br>[37]          |       |       |      |  |
| Vanderbeck S. et al. (2014)<br>[38] |       |       |      |  |
| Vanderbeck S. et al. (2015)<br>[39] |       |       |      |  |
| Wang TH et al. (2015)<br>[40]       | Green | Pink  |      |  |
| Munsterman I. et al. (2019)<br>[41] |       |       |      |  |
| Klimov S. et al. (2019)<br>[42]     |       |       |      |  |

|                                         |  |  |  |  |
|-----------------------------------------|--|--|--|--|
| Puri M. (2020)<br>[43]                  |  |  |  |  |
| Forlano et al. (2020)<br>[44]           |  |  |  |  |
| Teramoto T. et al. (2020)<br>[45]       |  |  |  |  |
| Salvi M. et al. (2020)<br>[46]          |  |  |  |  |
| Gawrieh S. et al (2020)<br>[47]         |  |  |  |  |
| Perez-Sans F. et al. (2021)<br>[48]     |  |  |  |  |
| Marti-Aguado D. et al. (2021)<br>[49]   |  |  |  |  |
| Sjöblom N. et al. (2021)<br>[50]        |  |  |  |  |
| Ramkissoon R. et al. (2022)<br>[51]     |  |  |  |  |
| Heinemann F. et al. (2022)<br>[52]      |  |  |  |  |
| Constantinescu C. et al. (2022)<br>[53] |  |  |  |  |

Low Risk  
High Risk  
Uncertain Risk  
Not applicable

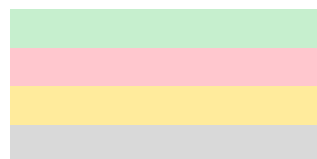

Supplement: s1 [file s1]
