# Supplementary material for: Artificial Intelligence-Based Opportunities in Liver Pathology—A Systematic Review
Source: MDPI journal article supplement (doi:10.3390/diagnostics13101799), 2023-05-19
Supplement: s1 [file s1]

| Authors [reference]    | DNN models tested<br>(* marks the best model if multiple) |
|------------------------|-----------------------------------------------------------|
| Feng Y. et al. [11]    | *U-Net                                                    |
|                        | DeeplabV3                                                 |
|                        | GCN                                                       |
|                        | SegNet                                                    |
|                        | PSPNet                                                    |
|                        | DeconvNet                                                 |
|                        | Atten-Unet                                                |
|                        | FCN                                                       |
| Cancian P. et al. [12] | U-Net                                                     |
|                        | SegNet                                                    |
|                        | *DeeplabV3                                                |
| Roy M. et al. [13]     | *HistoCAE (own)                                           |
|                        | ResNet101                                                 |
|                        | Vgg19                                                     |
|                        | DenseNet                                                  |
|                        | InceptionV3                                               |
|                        | U-Net                                                     |
|                        | SegNet                                                    |
|                        | DeeplabV3                                                 |
|                        | PSPNet                                                    |
|                        | RefineNet                                                 |
|                        | Mobile-UNet                                               |
| Wang X. et al. [14]    | *SEResNeXt-101                                            |
|                        | SegNet                                                    |
|                        | DeeplabV3                                                 |
|                        | U-Net++                                                   |
|                        | Dupsample                                                 |
|                        | OCNet                                                     |
| Feng S. et al. [15]    | ResNet18                                                  |
| Yang TL. et al. [16]   | VGG16                                                     |
|                        | InceptionV4                                               |
|                        | *FA-MSCN (own)                                            |
| Li S. et al. [17]      | MFC-CNN-softmax (own)                                     |
|                        | *MFC-CNN-ELM (own)                                        |
| Kiani A. et al. [18]   | DenseNet                                                  |

|                           |                         |
|---------------------------|-------------------------|
| Schau GF. et al. [19]     | own                     |
| Ercan C. et al. [20]      | U-net with ResNet34     |
| Diao S. et al. [21]       | *MSAN-CNN (own)         |
|                           | U-Net++                 |
|                           | DeeplabV3               |
|                           | Lite R-ASPP             |
| Cheng N. et al. [22]      | HnAIM (own)             |
| Chen M. et al. [23]       | InceptionV3             |
| Liao H. et al. [24]       | own                     |
| Saillard C. et al. [25]   | *SCHMOWDER (own)        |
|                           | CHOWDER (own)           |
| Yamashita et al. [26]     | HCC-SurvNet (own)       |
| Saito A. et al. [27]      | own                     |
| Xiao C. et al. [28]       | ResNet-50               |
| Chen Q. et al. [29]       | MVI-DL (own)            |
| Zeng Q. et al. [30]       | patch-based model (own) |
|                           | classic MIL model (own) |
|                           | *CLAM model (own)       |
| Qu WF. et al. [31]        | InceptionV3             |
| Xie J. et al. [32]        | U-Net + AlexNet         |
| Guo X. et al. [34]        | Clump_seg               |
|                           | ResNet41                |
|                           | *ResNet50               |
|                           | ResNet65                |
| Jirik M. et al. [35]      | UNet-Mini (own)         |
| Roy M. et al. [36]        | Delineate/U-Net (own)   |
| Yu H. et al. [37]         | MUSA-Unet (own)         |
| Vanderbeck S. et al. [38] | own                     |
| Vanderbeck S. et al. [39] | own                     |
| Wang TH et al. [40]       | own                     |
| Munsterman I. et al. [41] | own                     |
| Klimov S. et al. [42]     | NA                      |
| Puri M. [43]              | AutoML Vision           |
| Forlano R. et al. [44]    | own                     |
| Teramoto T. et al. [45]   | own                     |
| Salvi M. et al. [46]      | HEPASS (own)            |

|                               |                              |
|-------------------------------|------------------------------|
| Gawrieh S. et al. [47]        | own                          |
| Perez-Sans F. et al. [48]     | K-Nearest Neighbors model    |
|                               | *Naïve Baynes model          |
|                               | Random Forest model          |
|                               | Support Vector Machine model |
|                               | simple Neural Network model  |
|                               | Keras model                  |
| Marti-Aguado D. et al. [49]   | MATLAB (own)                 |
| Sjöblom N. et al. [50]        | K7-AI                        |
| Ramkissoon R. et al. [51]     | NA                           |
| Heinemann F. et al. [52]      | InceptionV3                  |
| Constantinescu C. et al. [53] | own                          |

NA

Not Available
