# Supplementary material for: Artificial Intelligence-Based Opportunities in Liver Pathology—A Systematic Review
Source: Diagnostics (Basel). 2023 May 19;13(10):1799. doi: 10.3390/diagnostics13101799 (PMC10217251; doi:10.3390/diagnostics13101799)
Supplement: Supplementary file 1 [file diagnostics-13-01799-s001.zip]

Archive with 4 entries (4 files):
- Supplementary table S3 IJMEDI checklist.xlsx
- TABLE S1 PRISMA_2020_checklist.pdf
- TABLE S2 models details.pdf
- TABLE S4 QUADAS 2 detail.pdf
