# Supplementary material for: Artificial Intelligence-Based Opportunities in Liver Pathology—A Systematic Review
Source: Diagnostics (Basel). 2023 May 19;13(10):1799. doi: 10.3390/diagnostics13101799 (PMC10217251; doi:10.3390/diagnostics13101799)
Supplement: Supplementary file 1 [file diagnostics-13-01799-s001.zip › Supplementary table S3 IJMEDI checklist.xlsx]

## Sheet: Feuil1
Reference	[11]	[12]	[13]	[14]	[15]	[16]	[17]	[18]	[19]	[20]	[21]	[22]	[23]	[24]	[25]	[26]	[27]	[28]	[29]	[30]	[31]	[32]	[34]	[35]	[36]	[37]	[38]	[39]	[40]	[41]	[42]	[43]	[44]	[45]	[46]	[47]	[48]	[49]	[50]	[52]	[53]
Problem understanding
1. Is the study population described, also in terms of inclusion/exclusion criteria?
2. Is the study design described?
3. Is the study setting described?
4. Is the source of data described?
5. Is the medical task reported?
6. Is the data collection process described, also in terms of setting-specific data collection strategies?
Data understanding
7. Are the subject demographics described in terms of average age/age variability/gender/comorbidities/ethnicity/socioeconomic status?
8. If the task is supervised, is the gold standard described? In particular, the authors should describe the process of ground truthing described in terms of: number of annotators producing the labels, their profession and expertise, instructions given for quality control, inter-rater agreement score labelling technique
9. Are the features described?
Data preparation
10. Is outlier detection and analysis performed and reported?
11. Is missing-value management described?
12. Is feature pre-processing performed and described?
13. Is data imbalance analysis and adjustment performed and reported?
Modeling
14. Is the model task reported?
15. Is the model output specified?
16. Is the model architecture or type described?
17. Is the data splitting described? In the case of data splitting, the authors must explicitly state that splitting was performed before any pre-processing steps or model construction steps
18. Is the model training and selection described? (range, selection and specification of hyper-parameters)
19. (classification models) Is the model calibration described?
20. Is the internal validation procedure described?
21. Has the model been externally validated?
22. Are the main error-based metrics used?
23. Are some relevant errors described? To detect relevant cases, the authors could focus on those cases on which the inter-rater agreement (either ground truth vs model's or human vs. model’s) is lowest
Deployment
24. Is the target user indicated?
25. (classification models) Is the utility of the model discussed? In particular, the authors are encouraged to discuss the selection of appropriate risk thresholds, the relative value of benefits/harms and the clinical utility of the proposed models)
26. Is information regarding model interpretability and explainability available?
27. Is there any discussion regarding model fairness, ethical concerns or risks of bias?
28. Is any point made about the environmental sustainability of the model, or about the carbon foot print of either the training phase or inference phase (use) of the model?
29. Is code and data shared with the community?
30. Is the system already adopted in daily practice?
No concern
Minor concern
Major concern
Not applicable
N.B : reference [51] was not available from our institution anymore at the time of this analysis, therefore it is not included in this table
